# Supplementary material
Source: Springer Nature journal article supplement (https://www.springermedizin.de/resource/supplementary/12885_2012_3342_MOESM2_ESM.pdf/9463276)
Supplement: MOESM2 [file 9463276]

**a**

67NR

66c14

4T07

4T1

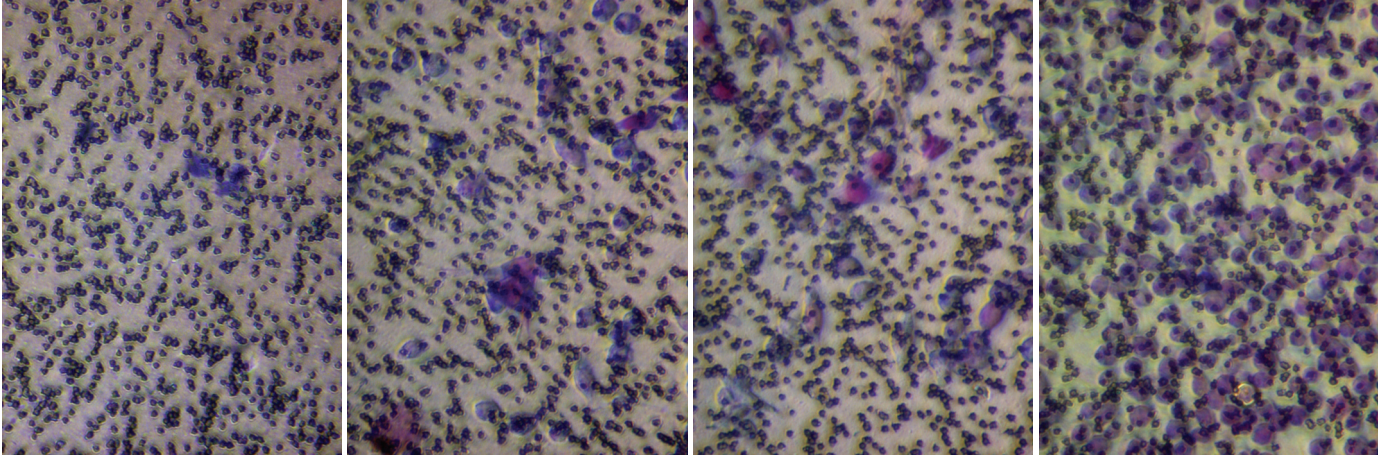

**b**

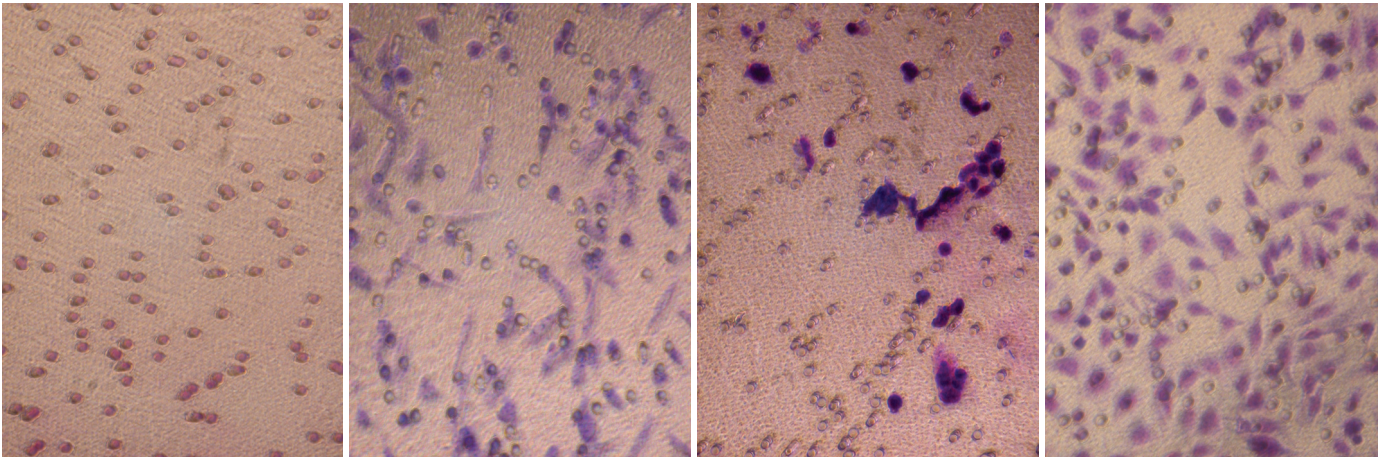

Figure S2
